# Supplementary material for: A split-type structure of Ag nanoparticles and Al2O3@Ag@Si nanocone arrays: an ingenious strategy for SERS-based detection
Source: Royal Society of Chemistry journal article supplement (doi:10.1039/c9nr09238b), 2019-12-13
Supplement: c9nr09238b1.pdf [file c9nr09238b1.pdf]

## Supporting Information

### Split-type Structure of Ag Nanoparticles and $\text{Al}_2\text{O}_3@\text{Ag}@\text{Si}$ nanocone arrays: An Ingenious Strategy for SERS-Based Detection

Zhen Wang<sup>a,b</sup>, Chunxue Zheng<sup>a,c</sup>, Peng Zhang<sup>a</sup>, Zhulin Huang<sup>a</sup>, Chuhong Zhu<sup>a</sup>,  
Xiujuan Wang<sup>a</sup>, Xiaoye Hu<sup>\*a</sup> and Jian Yan<sup>\*d</sup>

<sup>a</sup>Key Laboratory of Materials Physics, and Anhui Key Laboratory of Nanomaterials and Nanostructures, Institute of Solid State Physics, Chinese Academy of Sciences, Hefei, 230031, China E-mail: hxy821982@issp.ac.cn

<sup>b</sup>Anhui University, Hefei, 230039, China

<sup>c</sup>University of Science and Technology of China, Hefei, 230026, China

<sup>d</sup>School of Materials Science and Engineering, Hefei University of Technology, Hefei, 230009, China. E-mail: yanjian@hfut.edu.cn

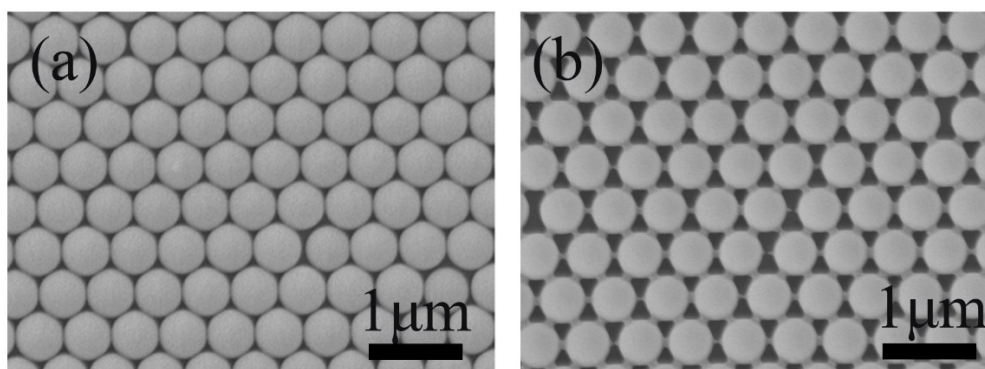

**Fig. S1** (a) SEM image of the PS colloidal monolayer on a Si wafer. (b) PS monolayer after Plasma etching.

Firstly, through gas/liquid interface self-assembly, close-packed and uniform PS monolayer colloidal crystals were prepared on a cleaned glass substrate. The formed PS monolayer colloidal crystals kept in an oven at 120 °C for 2 min to make the PS spheres become planar and form contact with the silicon substrate. Etching was carried out using  $\text{SF}_6$  plasma in a conventional RIE machine with a flow rate of 36 sccm, a pressure of 3.2 Pa, and a RF power of 200 W. The residual PS micro-spheres coated on the top side of the silicon nanocones were removed by immersion in methylene chloride ( $\text{CH}_2\text{Cl}_2$ ) for 2 minutes. <sup>1</sup>

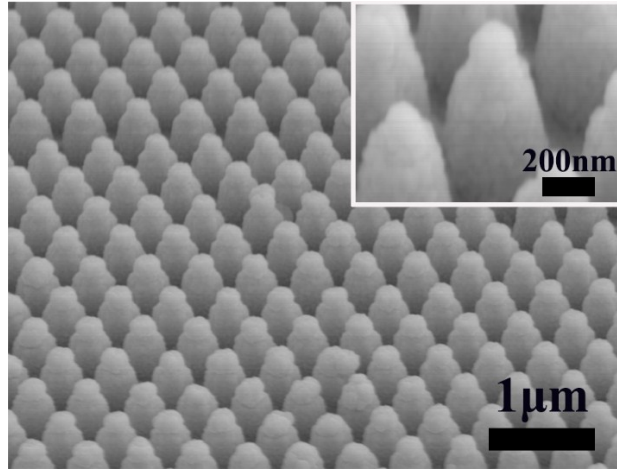

**Fig. S2** SEM image of Ag@Si nanocone arrays coated with ultrathin 2 nm Al<sub>2</sub>O<sub>3</sub> films by ALD.

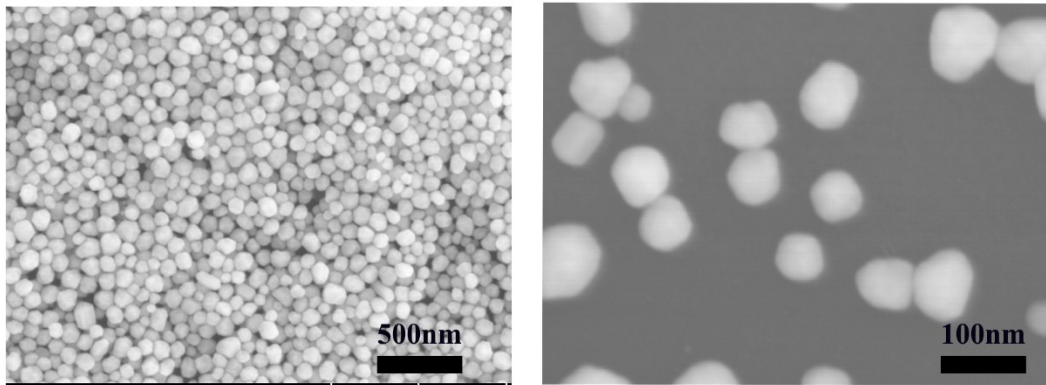

**Fig. S3** SEM images of Ag- NPs prepared by liquid phase method.

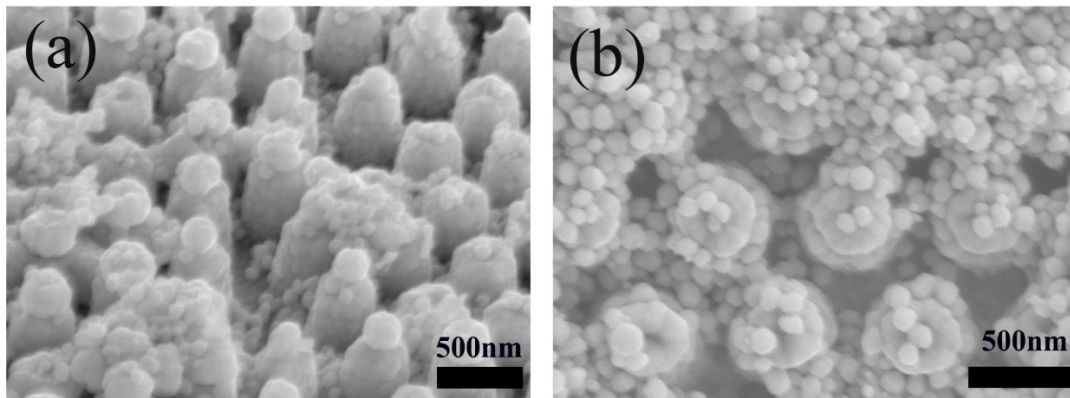

**Fig. S4** SEM images of unmodified Al<sub>2</sub>O<sub>3</sub>@Ag@Si nanocone array combined with Ag-NPs.

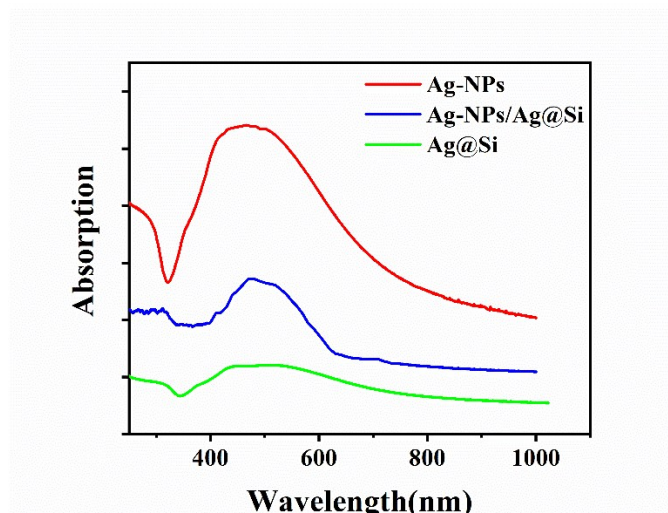

**Fig. S5** UV–Vis–NIR absorption spectra of different Ag related substrates.

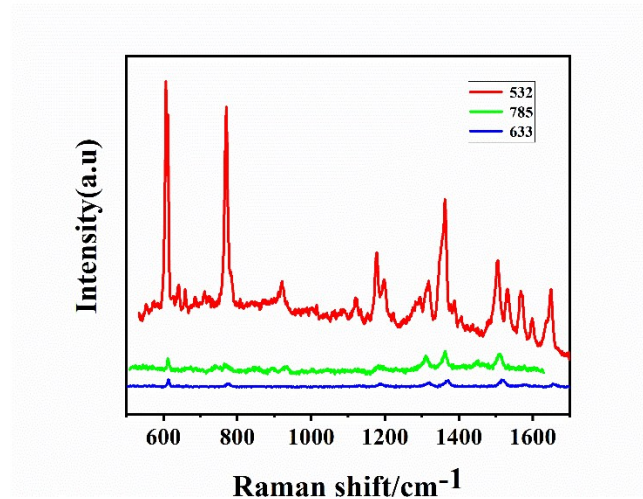

**Fig. S6** SERS spectra of R6G ( $10^{-8}$  M) adsorbed on the split-type substrate examined by 532, 633, and 785 nm excitations.

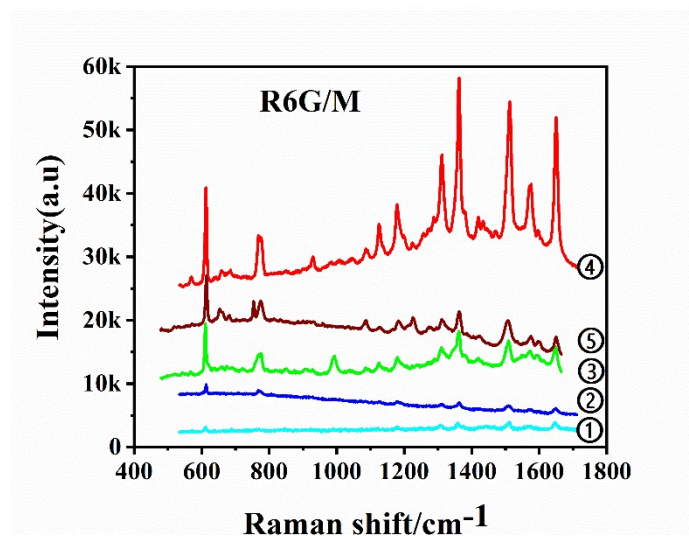

**Fig. S7** Comparative SERS spectra of different Ag related substrates. ①Film of Ag NPs.②Ag@Si nanocone arrays without Ag-NPs. ③Ag-NPs@Ag@Si nanocone

without  $\text{Al}_2\text{O}_3$  shell. ④ Ag-NPs@  $\text{Al}_2\text{O}_3$ @Ag@Si array. ⑤ Ag-NPs@  $\text{Al}_2\text{O}_3$ @Ag film.

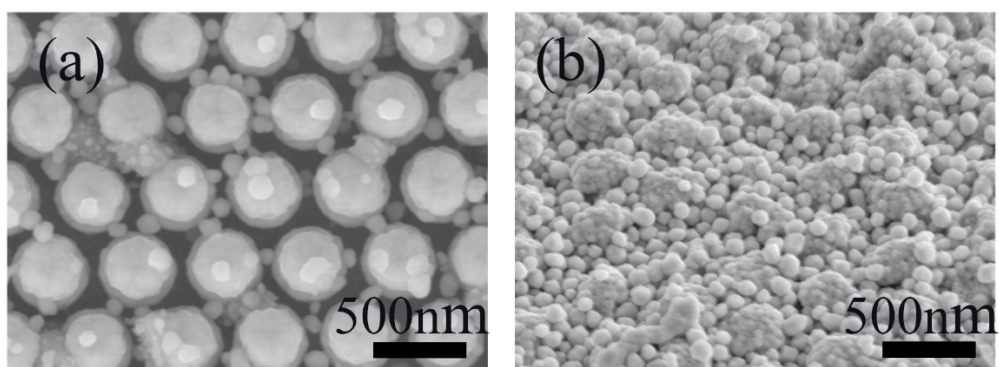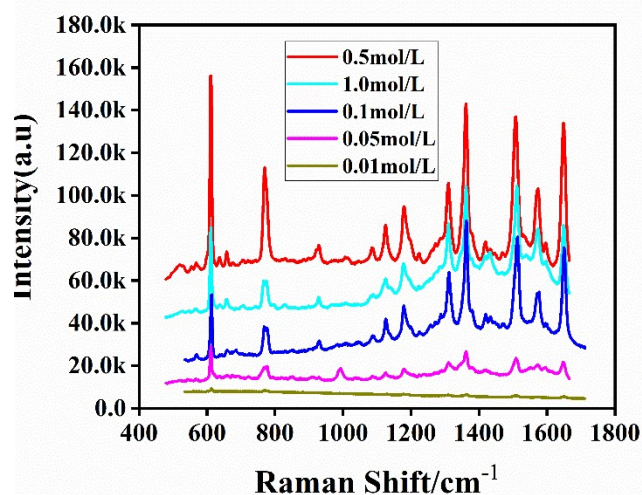

**Fig. S8** SEM images of Ag-NPs@ $\text{Al}_2\text{O}_3$ @Ag@Si with low (a 0.05mol/L) and high (b 1.0mol/L) concentration. The following diagram shows raman spectra of R6G with Ag-NPs varied concentrations adsorbed on the split-type substrates.

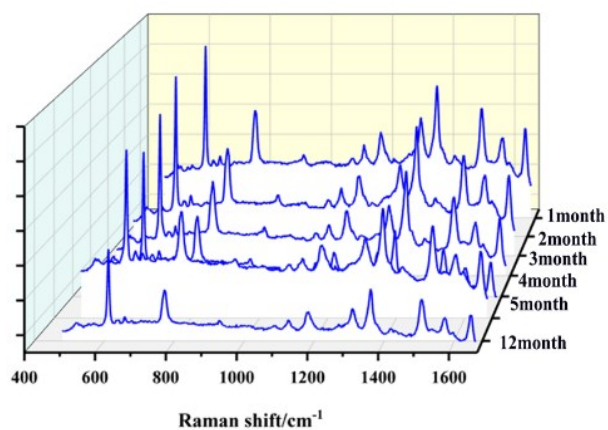

**Fig. S9** Raman spectra of R6G ( $10^{-8}$  M) measured at different stock time.

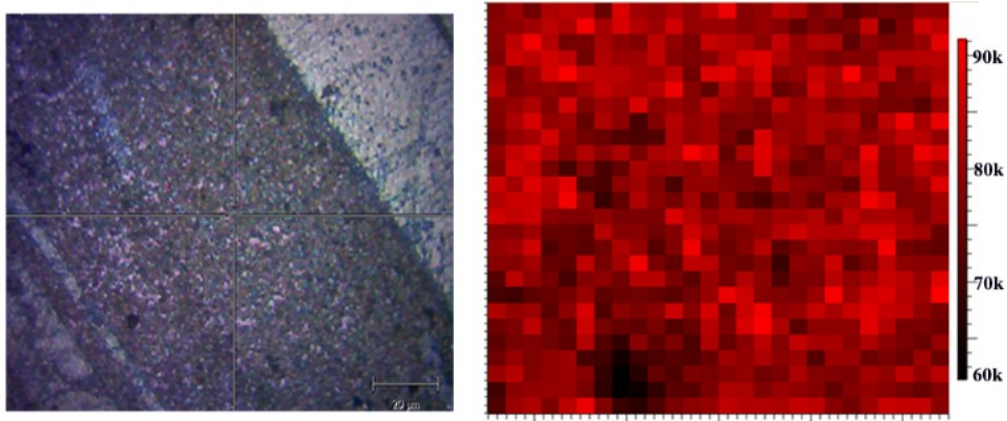

**Fig. S10** Optical image of split-type substrates and SERS mapping of 4-ATP on the area.

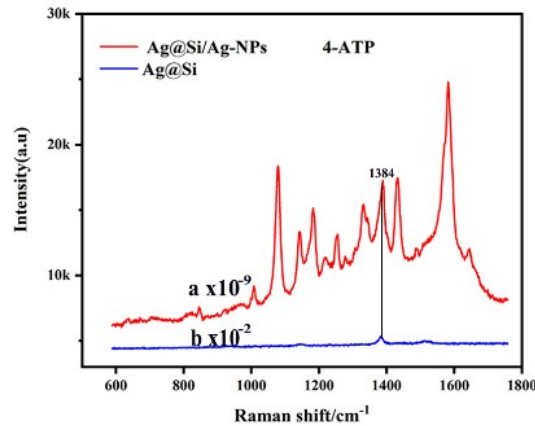

**Fig. S11** SERS spectrum of the split-type substrate (upper curve) and normal Raman spectrum of 4-ATP.

$EF = (I_{SERS}/N_{SERS})(I_{RS}/N_{RS})^{-1}$  Considering the area of laser spot is the same, the foregoing equation thus simply are transformed into:  $N_{SERS} = (C_{SERS} \cdot V_{SERS}) / S_{SERS}$  SERS spectra of 5 μL 10<sup>-9</sup> M 4-ATP ethanol solution dispersed on split-type substrates with area of 25 mm<sup>2</sup> (a) , and (b) Raman spectrum of 4-ATP obtained by dispersing 1 μL 10<sup>-2</sup> M 4-ATP ethanol solution on 25 mm<sup>2</sup> Ag@Si wafer.

$I_{SERS}$  and  $I_{NRS}$  correspond to the integrated SERS and NRS intensities, respectively, normalized for acquisition time and laser power. The average surface of a nanocone (with an average diameter of 200 nm and an average length of 500 nm) is  $S_{SERS} = 500 \times 100^2 \pi / 3 = 1.66 \times 10^6$  (nm<sup>2</sup>) .  $S_{NRS} = 200 \times 200 = 4 \times 10^4$  (nm<sup>2</sup>) . So  $EF = (I_{SERS}/N_{SERS}) / (I_{NRS}/N_{NRS}) = [1.3 \times 10^4 \times 1.66 \times 10^6 / (1 \times 10^{-9})] / [(3.1 \times 10^3 \times 4 \times 10^4) / (1 \times 10^{-2})] =$

$6.96 \times 10^9$ .

## References

- 1 Q. Zhao, G. Liu, H. Zhang, F. Zhou, Y. Li, W. Cai, *J Hazard Mater*, 2017, **324** 194-202.
